# Supplementary material
Source: PubMed Central journal article supplement (PMC8785736)
Supplement: 6189_4_supp_59767_qkbj6r.pdf [file 6189_4_supp_59767_qkbj6r.pdf]

## **SUPPLEMENTAL MATERIALS**

### CONTENTS:

Page 2 – CONSORT Diagram for Cohort Selection

Page 3 - Quality control plots from Deming regressions

Page 4 - Sensitivity analyses for Cox Proportional Hazards models

## SUPPLEMENTAL MATERIALS

### CONSORT Diagram: Selection of Cohort Participant Data for Inclusion in Analyses

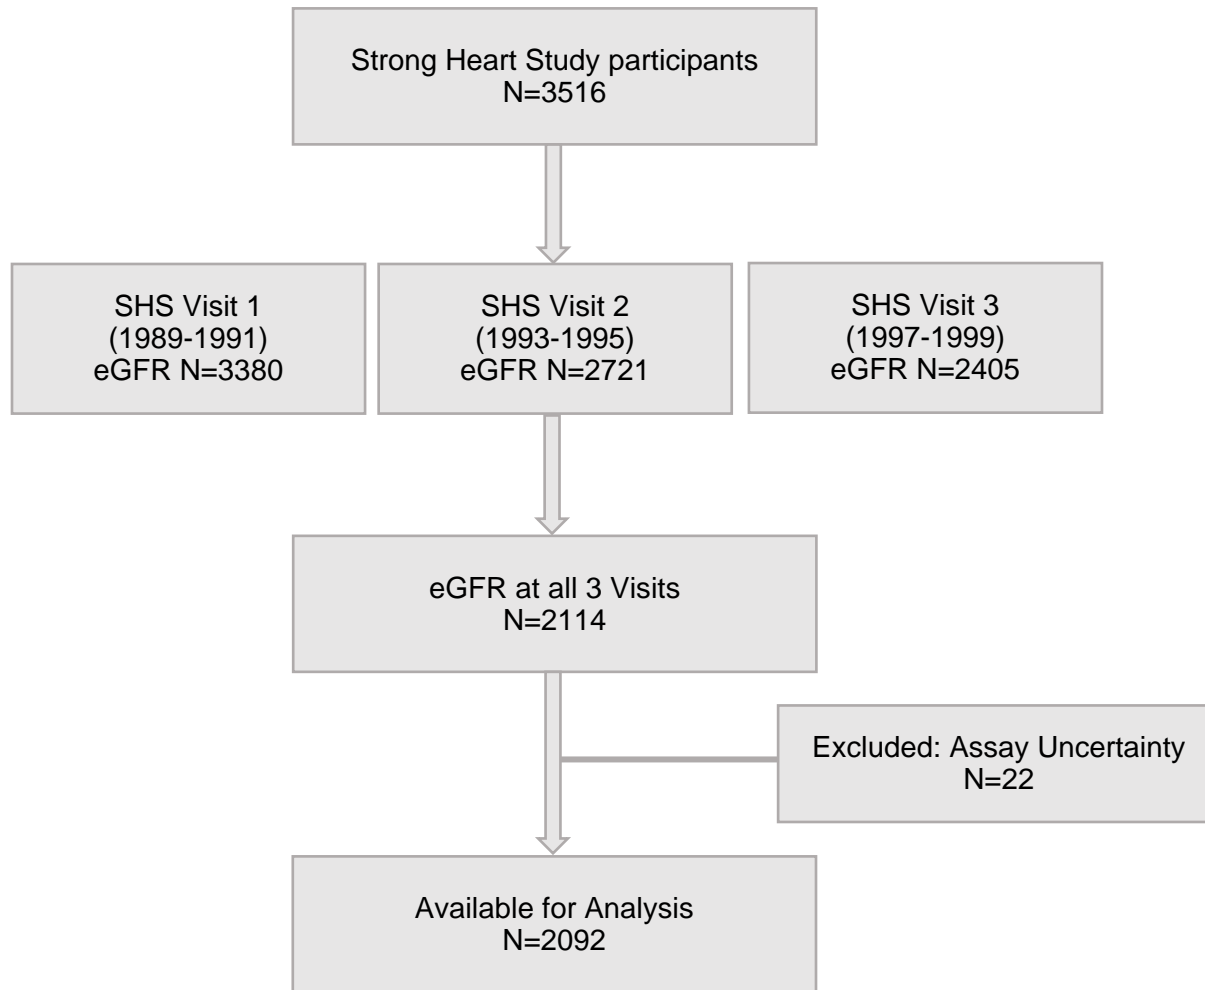

Quality control plots from Deming regressions

**Bland-Altman plot - SHS S1**

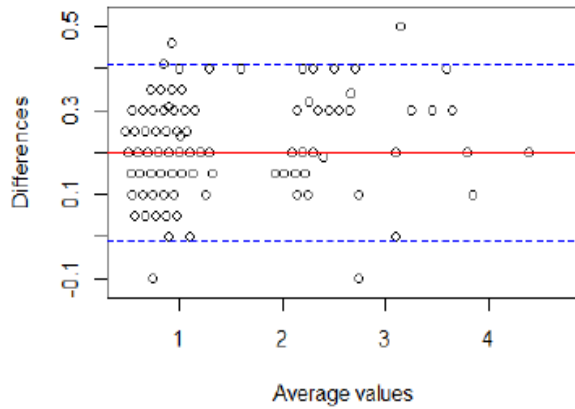

**Bland-Altman plot - SHS S2**

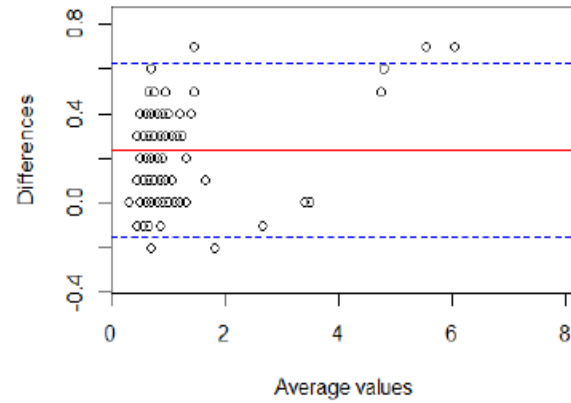

**Bland-Altman plot - SHS S3**

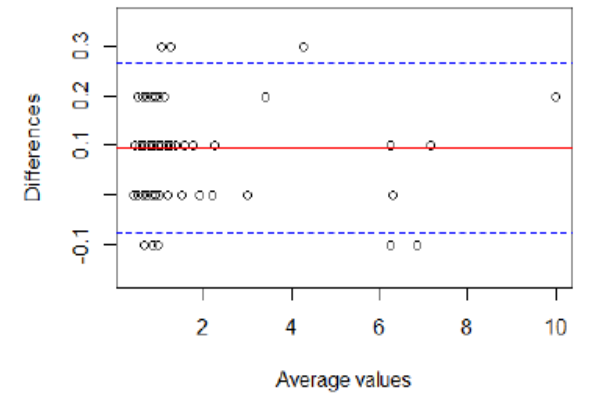

**Residual vs Fitted values for Deming Regression**

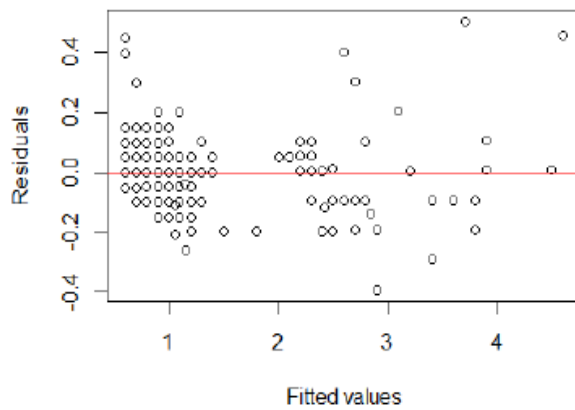

**Residual vs Fitted values for Deming Regression**

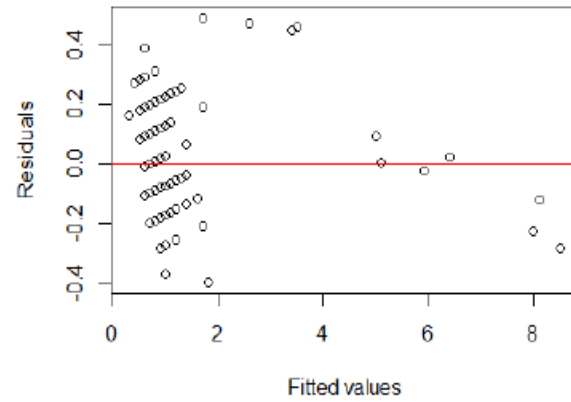

**Residual vs Fitted values for Deming Regression**

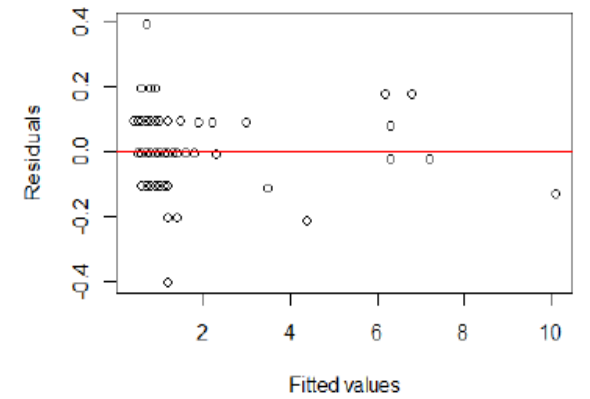

## SUPPLEMENTAL MATERIALS

Sensitivity Analyses: Cox Models for CKD exposure, but without adjustment for slope, to ensure that lack of associations in primary models are not an issue of power: model adjusted for age; sex; and field center

| <b>Exposure: CKD</b> |              |             |                |
|----------------------|--------------|-------------|----------------|
| Outcome              | Hazard Ratio | 95% CI      | <i>P-value</i> |
| Mortality            | 2.43         | (2.00-2.96) | <0.001         |
| All CVD              | 1.23         | (0.96-1.57) | 0.099          |
| Stroke               | 1.74         | (1.17-2.58) | 0.006          |
| CHF                  | 1.47         | (1.02-2.12) | 0.039          |
